# Supplementary material
Source: PubMed Central journal article supplement (PMC2823886)
Supplement: 0915018107_pnas.200915018SI.pdf [file 0915018107_pnas.200915018SI.pdf]

# Supporting Information

Cohen et al. 10.1073/pnas.0915018107

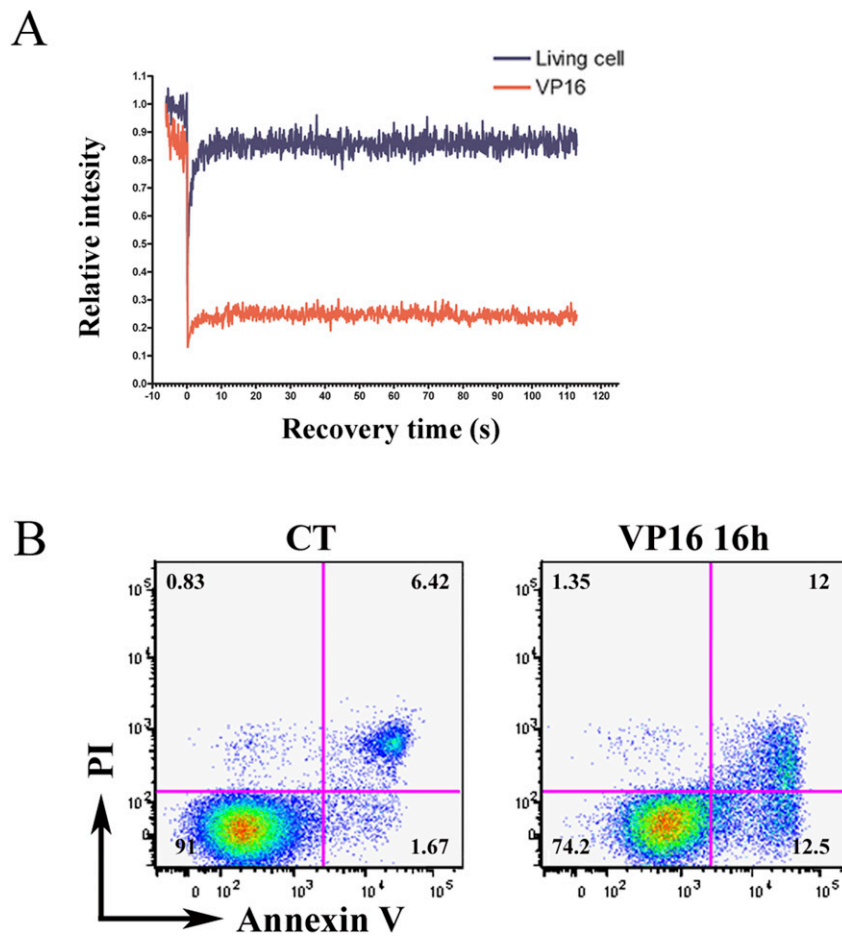

**Fig. S1.** Dynamics of preCL-1 $\alpha$  in living and VP16-treated cells. (A) Kinetics of nucleoplasmic FRAP in living or VP16-treated B16 melanoma cells transfected with preCL-1 $\alpha$ -GFP. Fluorescence intensity in the bleached region was measured for at least 110 s and expressed as the relative intensity. Data values in FRAP kinetics represent one of six independent experiments. (B) FACS analysis of annexin-V/PI-stained B16 melanoma cells treated with 20  $\mu$ g/mL VP16.

A

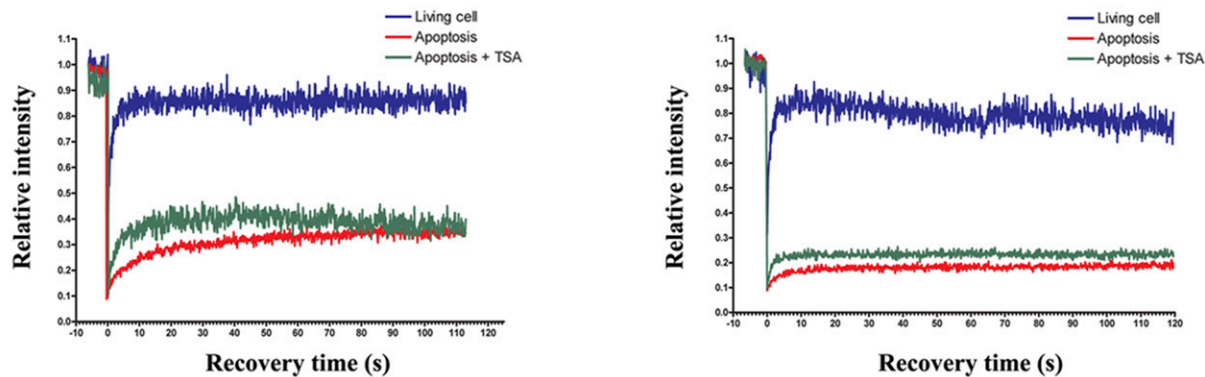

B

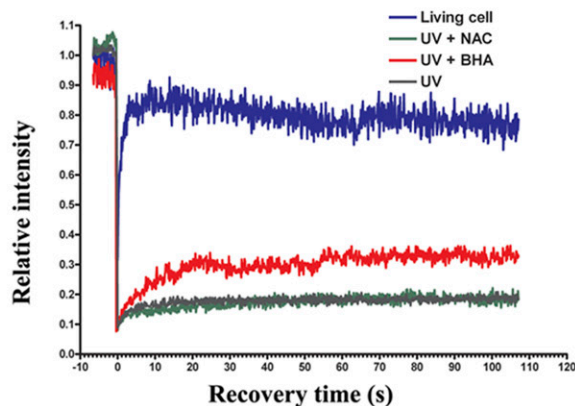

**Fig. S2.** ROS scavengers and a histone deacetylase inhibitor do not alter the nonreversible nature of IL-1 $\alpha$  proteins in the nucleus of apoptotic cells. (A) Kinetics of nucleoplasmic FRAP in living cells, UV-irradiated cells and UV-irradiated cells treated with 200 ng ml<sup>-1</sup> TSA. B16 melanoma cells transfected with pprL-1 $\alpha$ -GFP (*Left*) and pprL-1 $\alpha$ -GFP (*Right*). (B) Kinetics of nucleoplasmic FRAP in living cells and UV-irradiated cells treated with the ROS scavengers NAC or BHA. Fluorescence intensity in the bleached region was measured for at least 110 s and expressed as the relative intensity. Data values in FRAP kinetics represent one of six independent experiments.

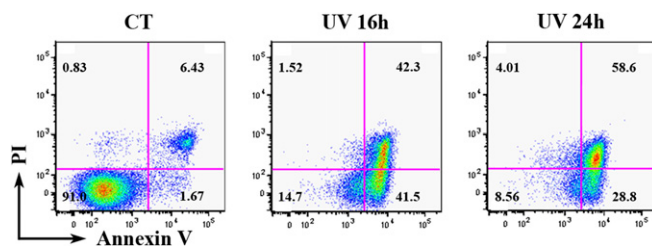

**Fig. S3.** Progression of the apoptotic process in UV-irradiated murine B16 melanoma cells. Apoptosis was induced in B16 melanoma cells by 3 min of UV irradiation. The rate of apoptosis was evaluated by annexin-V/PI staining and analyzed by FACS 16 h or 24 h after UV irradiation.

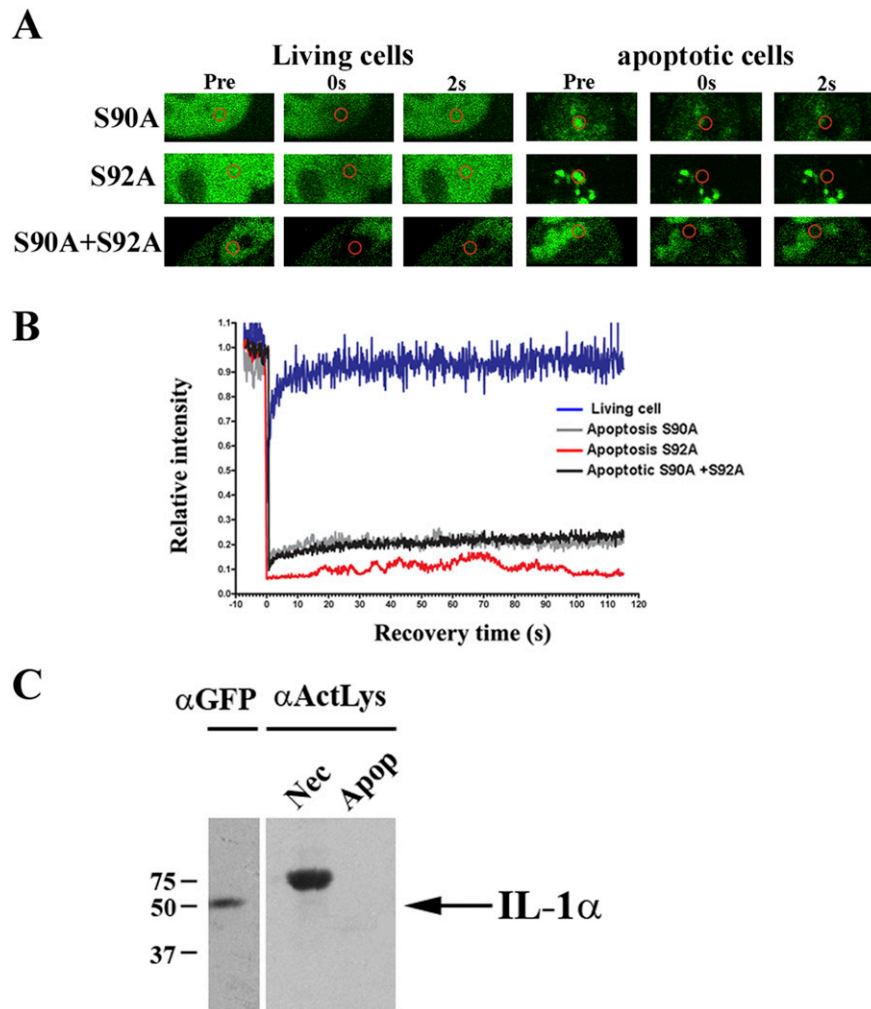

**Fig. 54.** Posttranslational modifications do not affect IL-1 $\alpha$  precursor mobility during apoptosis. (A) FRAP experiments in living and apoptotic cells expressing preIL-1 $\alpha$ -GFP and mutants of preIL-1 $\alpha$ -GFP within serine 90, 92, and 90+92 (substitution of serine residues in positions 90, 92, and 90+92 to alanine). The area of the bleach spot is indicated with a red circle. (B) Kinetics of nucleoplasmic FRAP in living or apoptotic transfectants of preIL-1 $\alpha$ -GFP and mutants of preIL-1 $\alpha$ -GFP within serine 90, 92, and 90+92. Fluorescence intensity in the bleached region was measured for at least 110 s and expressed as the relative recovery. Data values in FRAP kinetics represent one of six independent experiments. (C) Western blot analysis using antiacetylated lysine antibody was used to detect acetylated lysine residues within apoptotic and necrotic cell lysates. IL-1 $\alpha$  position was detected with anti-GFP antibody.
